# Supplementary material for: Novel Exon-Skipping Therapeutic Approach for the DMD Gene Based on Asymptomatic Deletions of Exon 49
Source: MDPI journal article supplement (doi:10.3390/genes13071277), 2022-07-19
Supplement: s1 [file s1]

Supplementary Table S1

| Authors                   | Phenotype             | Patients                                                                    | Genomic Breakpoints(hg19/GRCH37)  | Notes                                                 |
|---------------------------|-----------------------|-----------------------------------------------------------------------------|-----------------------------------|-------------------------------------------------------|
| Banerjee et al.           | DMD                   | 2                                                                           | Unknown                           |                                                       |
| Giliberto et al.          | DMD                   | 1                                                                           | Unknown                           | Dystrophin Absent on WB                               |
| Mital et al.              | DMD                   | 3, (DG, KS, RI)                                                             | Unknown                           | we note for KS and RI that southern blots were normal |
| Zamani et al.             | DMD                   | 1                                                                           | Unknown                           |                                                       |
| Deepha et al.             | DMD                   | 3 (205,206,210)                                                             | Unknown                           |                                                       |
|                           | BMD                   | 1 (209)                                                                     |                                   |                                                       |
| UMD-DMD                   | Unknown               | 3 (ID :17760,17686, 17572)                                                  | Unknown                           | Origins : China                                       |
| Brisson et al.            | Likely DMD            | Family ID: 6                                                                | g.( ?_31,854,529)_(31,877,889_ ?) | NIPS then verified by CGH array in a male foetus      |
| Marey et al.              | BMD                   | 1 (Patient #5272)                                                           | g.31839857_31892375del            | <b>Only deletion with precise genomic breakpoints</b> |
| Yun et al.                | BMD                   | 2 (ID: 15, 15-1)                                                            | Unknown                           |                                                       |
| Clinvar (Baylor Genetics) | BMD                   | Variant ID : 625643                                                         | Unknown                           | Clinvar (Baylor Genetics)                             |
| Clinvar (invitae)         | DMD                   | Variant ID : 833063                                                         | Unknown                           | Clinvar (invitae)                                     |
| LOVD                      | BMD                   | Individual: 00135563                                                        |                                   |                                                       |
|                           | Unknown (Pathogenic?) | Individuals: 00137264,00239877,00297283,00297696,00287744,00297304,00297717 |                                   |                                                       |

List of reported isolated deletion of exon 49 in literature, in total : 28 isolated deletion of exon 49
